# Supplementary material for: Aquatic photodegradation of clofibric acid under simulated sunlight irradiation: kinetics and mechanism analysis
Source: Royal Society of Chemistry journal article supplement (doi:10.1039/c8ra03140a), 2018-01-01
Supplement: c8ra03140a1.pdf [file c8ra03140a1.pdf]

## Supplementary material

### Aquatic photodegradation of clofibric acid under simulated sunlight

#### irradiation: kinetics and mechanisms analysis

Xiangdan Zhang<sup>a,\*</sup>, Zongchao Liu<sup>a</sup>, Qingqing Kong<sup>b</sup>, Guoguang Liu<sup>a</sup>, Wenying Lv<sup>a</sup>, Fuhua Li<sup>a</sup>, Xiaoxuan Lin<sup>a</sup>

Fig.S1 The emission spectrum of the Xenon lamp and sunlight.

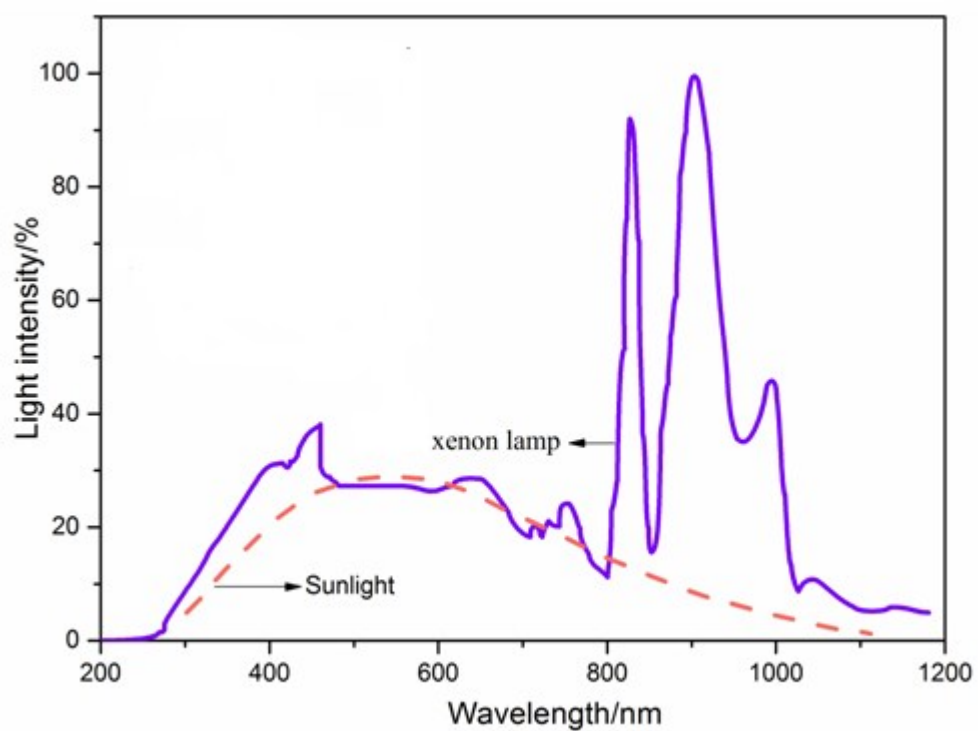

Fig.S2 Fragment chart of the secondary ion mass spectrometry of P<sub>1</sub>-P<sub>8</sub>

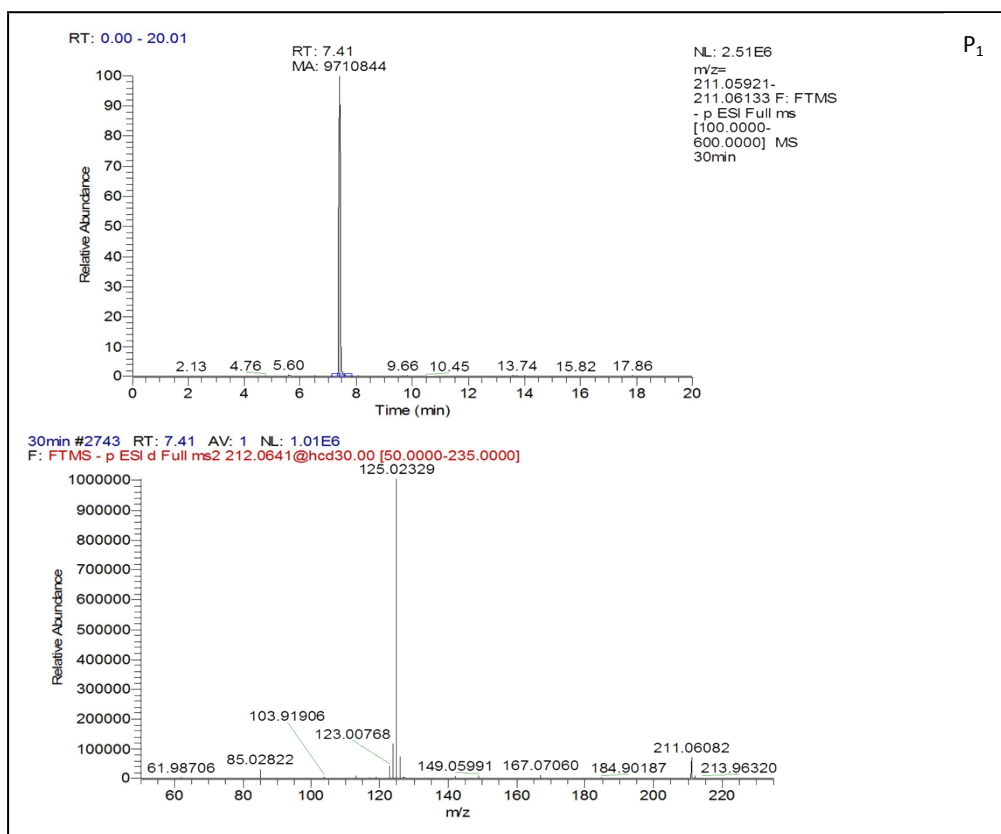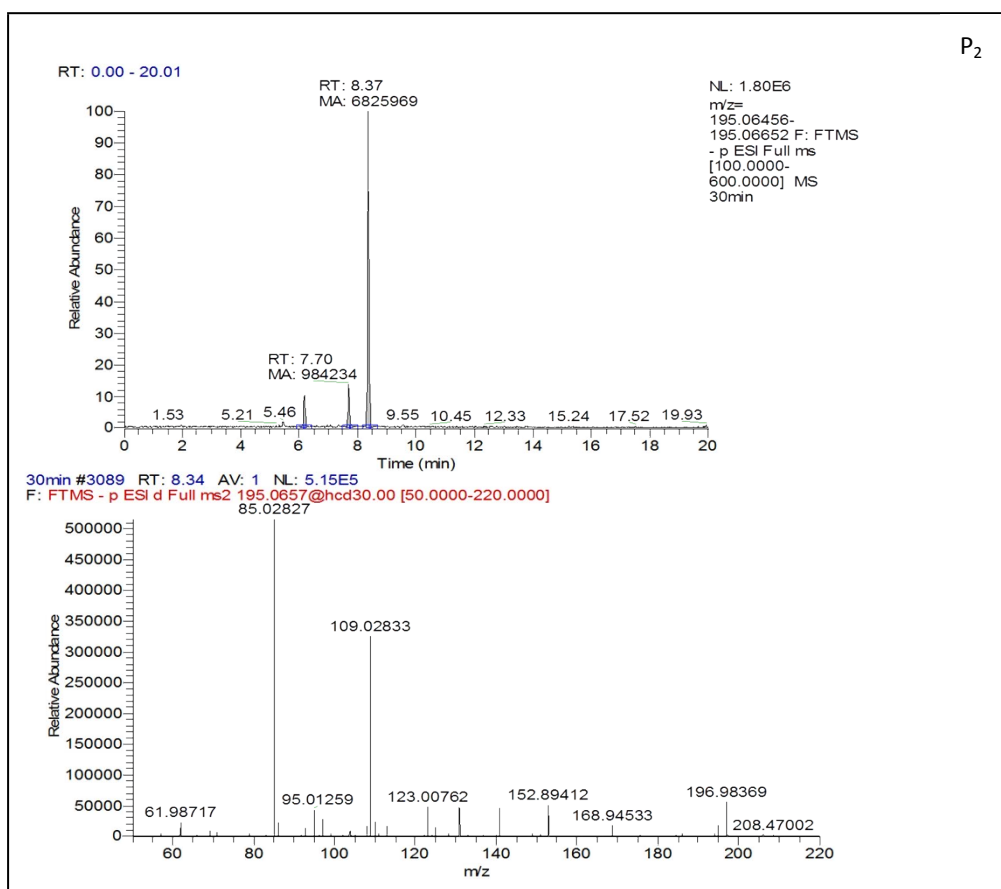

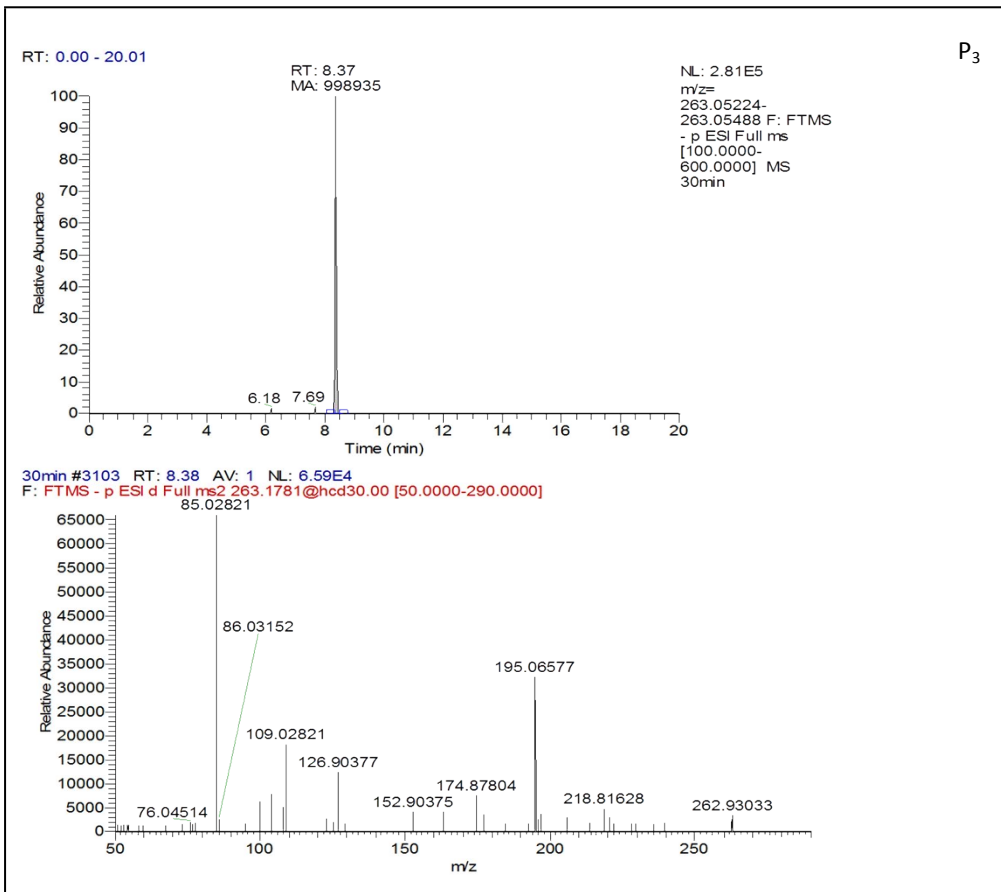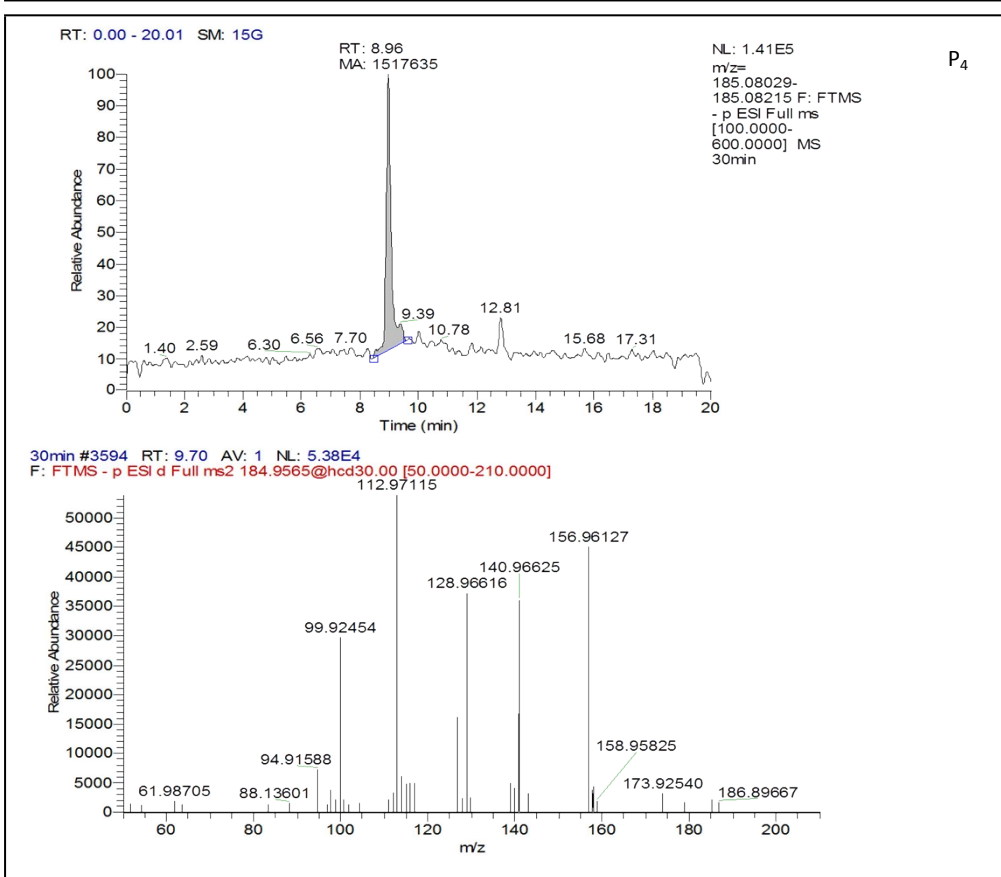

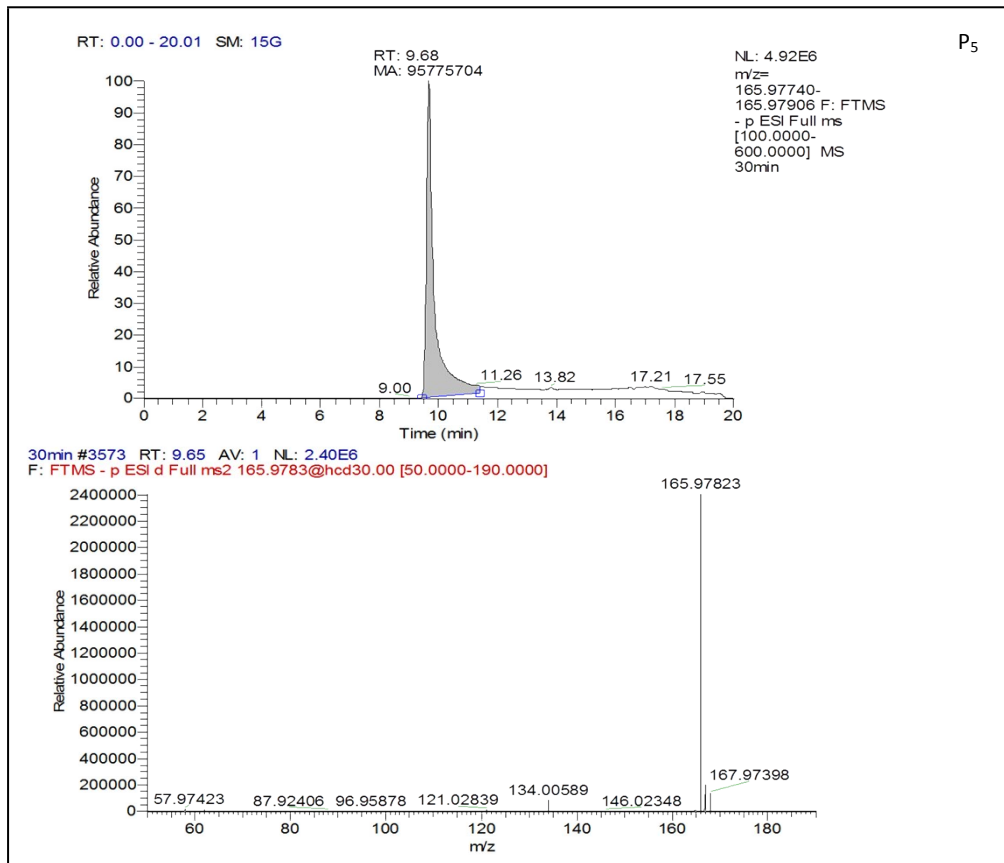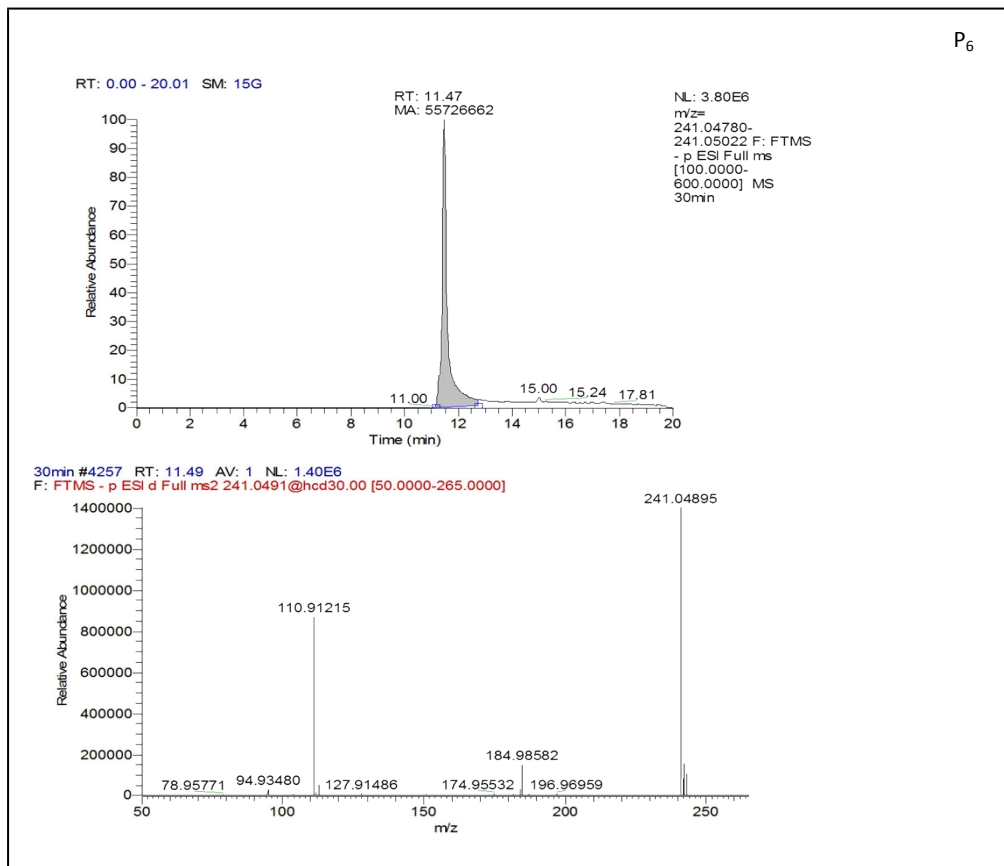

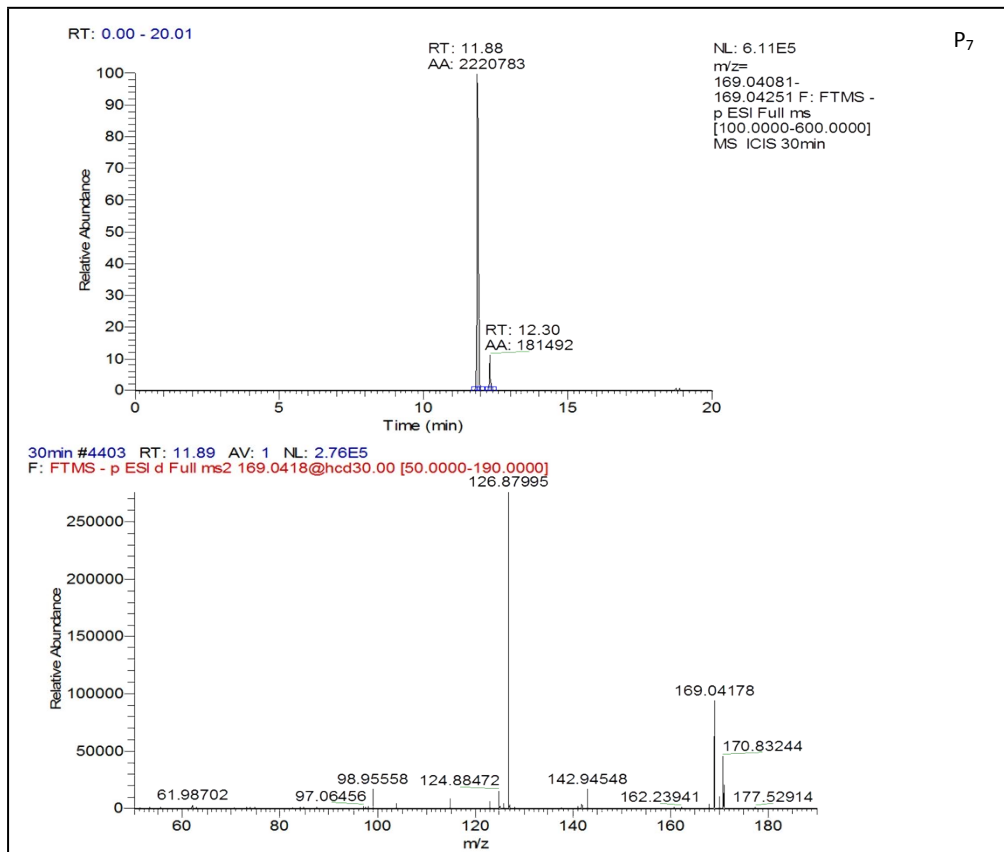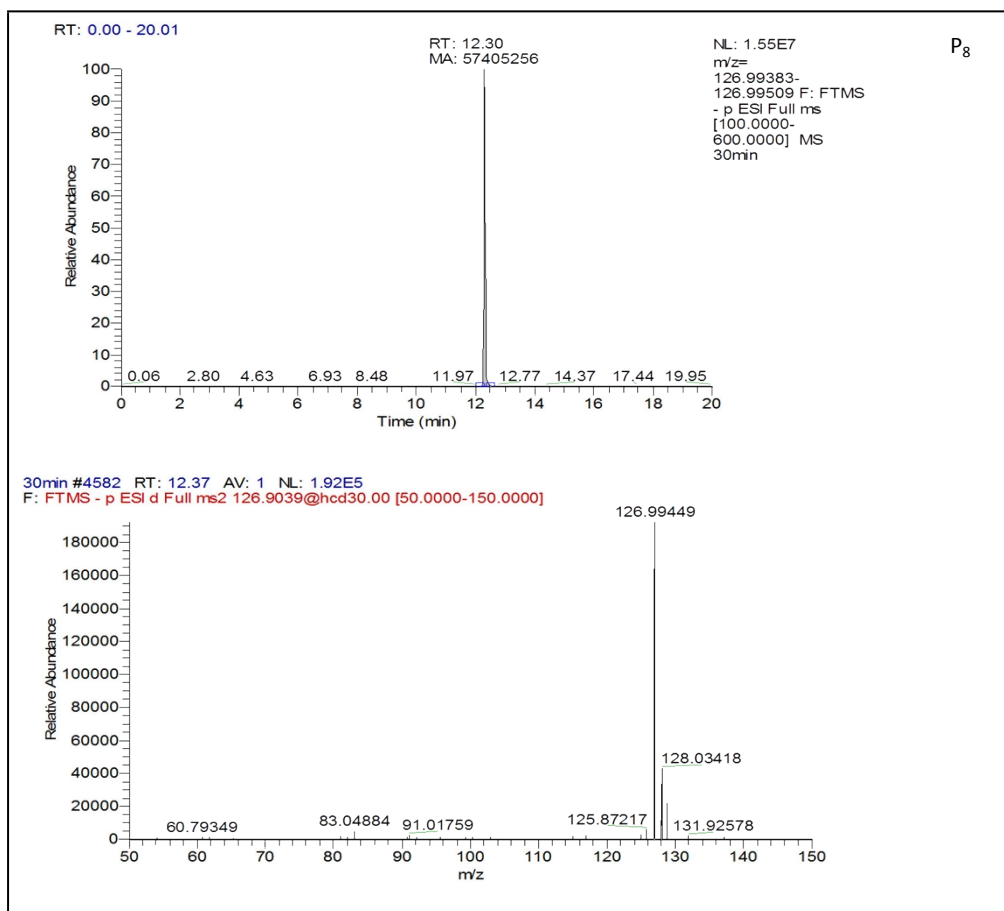

Table S1 Primary properties of water samples

| Parameter                      | Unit | Tap Water | Zhujiang River Water |
|--------------------------------|------|-----------|----------------------|
| pH                             | -    | 7.05      | 7.03                 |
| TOC                            | mg/L | 1.416     | 2.796                |
| UV <sub>254</sub>              | -    | 0.0162    | 0.049                |
| K <sup>a</sup>                 | mg/L | 0.380     | 0.649                |
| Ca <sup>a</sup>                | mg/L | 41.553    | 45.696               |
| Na <sup>a</sup>                | mg/L | 88.754    | 91.042               |
| Mg <sup>a</sup>                | mg/L | 5.547     | 5.704                |
| Cu <sup>a</sup>                | µg/L | 1.122     | 1.729                |
| Fe <sup>a</sup>                | µg/L | 2.971     | 5.447                |
| Zn <sup>a</sup>                | µg/L | 3.586     | 2.929                |
| Cl <sup>-b</sup>               | mg/L | 14.642    | 22.887               |
| NO <sub>3</sub> <sup>-b</sup>  | mg/L | 9.681     | 11.068               |
| SO <sub>4</sub> <sup>2-b</sup> | mg/L | 23.354    | 37.611               |
| HCO <sub>3</sub> <sup>-c</sup> | mg/L | 3.81      | 4.87                 |
| PO <sub>4</sub> <sup>3-b</sup> | mg/L | n.a.      | n.a.                 |

<sup>a</sup> Detected by ICP-MS.

<sup>b</sup> Detected by anions-ion chromatography.

<sup>c</sup> Detected by titration.

n.a. Not detected.
